# Supplementary material
Source: Springer Nature journal article supplement (https://www.springermedizin.de/resource/supplementary/12875_2010_563_MOESM2_ESM.pdf/9434950)

The information on the sheet was clear and easy for me to understand

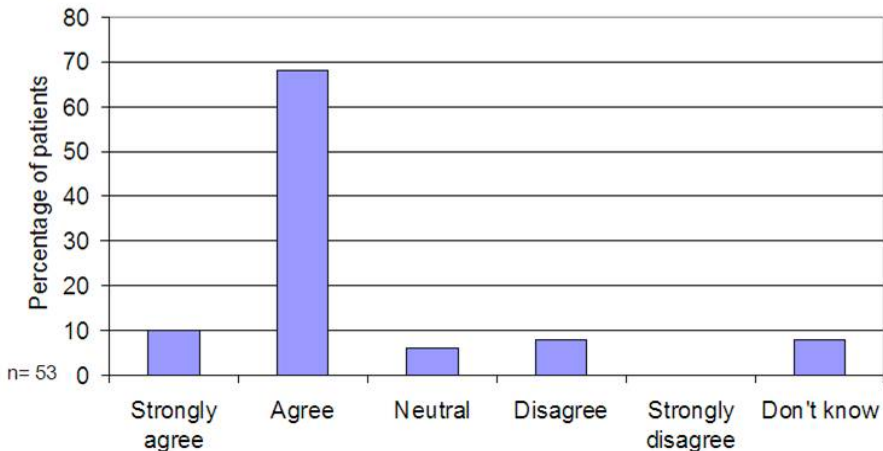

Supplement: MOESM2 [file 9434950]
